# Supplementary material for: “As soon as you’ve had the baby that’s it…” a qualitative study of 24 postnatal women on their experience of maternal obesity care pathways
Source: Springer Nature journal article supplement (doi:10.1186/s12889-016-3289-1), 2016-07-22
Supplement: MOESM1 [file 10514456]

Additional file 1: Maternal obesity care pathways according to BMI (2012)

| Visit                                                                        | Action Antenatal                                                                                                            |           | √ Tick or add when complete or N/A |             |         |
|------------------------------------------------------------------------------|-----------------------------------------------------------------------------------------------------------------------------|-----------|------------------------------------|-------------|---------|
|                                                                              |                                                                                                                             |           | BMI 30-34.9                        | BMI 35-39.9 | BMI ≥40 |
| <b>Booking</b>                                                               | Calculate and record BMI                                                                                                    | Wt        |                                    |             |         |
|                                                                              | <b>TICK</b> appropriate BMI pathway to be followed √                                                                        | BMI:<br>→ |                                    |             |         |
|                                                                              | Explain Body Mass Index (BMI)                                                                                               |           |                                    |             |         |
|                                                                              | Book for maternity team based care<br>Refer to:<br>-High Dependency Antenatal Clinic if other co-morbidities present        |           |                                    |             |         |
|                                                                              | -Healthy Life style clinic if BMI ≥40 & <b>no</b> co-morbidities present (Site X only)                                      |           |                                    |             |         |
|                                                                              | Booking BMI≥35 advised to deliver in obstetric led unit                                                                     |           |                                    |             |         |
|                                                                              | Discuss Healthy Life Style information leaflet/web pages                                                                    |           |                                    |             |         |
|                                                                              | Initiate discussion on weight management in pregnancy                                                                       |           |                                    |             |         |
|                                                                              | Exercise advise given                                                                                                       |           |                                    |             |         |
|                                                                              | Offer Folic acid 5mg                                                                                                        |           |                                    |             |         |
|                                                                              | Offer & discuss Vitamin D 10µg (Healthy Start Women's Vitamins)                                                             |           |                                    |             |         |
|                                                                              | <b>Book OGTT screening on :</b><br><b>Previous gestational diabetes</b><br>Screen 1. at 16-18weeks<br>Screen 2. at 28 weeks |           |                                    |             |         |
|                                                                              | <b>All other women</b><br>Screen between 24-28weeks                                                                         |           |                                    |             |         |
|                                                                              | <b>SITE Y- BMI 30-35 for RBS at booking not for OGTT</b>                                                                    |           |                                    |             |         |
|                                                                              | Complete VTE risk assessment                                                                                                |           |                                    |             |         |
| Complete Thyroid function test                                               |                                                                                                                             |           |                                    |             |         |
| Discuss the risks of raised BMI -document possible intrapartum complications |                                                                                                                             |           |                                    |             |         |
| Use appropriate BP cuff document size                                        |                                                                                                                             |           |                                    |             |         |
| <b>High dependency care / ANC</b>                                            | Discuss weight management and exercise in pregnancy                                                                         |           |                                    |             |         |
|                                                                              | Undertake MRSA screening as per protocol.                                                                                   |           |                                    |             |         |
|                                                                              | Review VTE score and need for enoxaparin                                                                                    |           |                                    |             |         |
|                                                                              | Complete alert card in hand held notes: BMI, antenatal plan, delivery plan, all pathways                                    |           |                                    |             |         |
|                                                                              | Arrange 20 week anomaly scan                                                                                                |           |                                    |             |         |

| Visit         | Action Antenatal                                        |  | √ Tick or add when complete or N/A |             |         |
|---------------|---------------------------------------------------------|--|------------------------------------|-------------|---------|
|               |                                                         |  | BMI 30-34.9                        | BMI 35-39.9 | BMI ≥40 |
| <b>20 wks</b> | USS for fetal wellbeing                                 |  |                                    |             |         |
|               | Provide infant feeding information                      |  |                                    |             |         |
|               | Review all pathways                                     |  |                                    |             |         |
|               | Discuss signs & symptoms of pre-eclampsia & advice line |  |                                    |             |         |
|               | Refer for Anaesthetic consultation                      |  |                                    |             |         |
|               | Arrange USS for 32 & 36 weeks                           |  |                                    |             |         |
|               | Check GTT is booked                                     |  |                                    |             |         |
|               | RBS result (SITE Y)                                     |  |                                    |             |         |
|               | Follow up investigation results                         |  |                                    |             |         |
|               | Discuss weight management and exercise in pregnancy     |  |                                    |             |         |

Additional file 1: Maternal obesity care pathways according to BMI (2012)

|                                                                                                     |                                                                                                 |  |  |  |
|-----------------------------------------------------------------------------------------------------|-------------------------------------------------------------------------------------------------|--|--|--|
| <b>32-34 wks</b>                                                                                    | USS for growth and fetal wellbeing                                                              |  |  |  |
|                                                                                                     | Weigh and calculate weight gain                                                                 |  |  |  |
|                                                                                                     | Antenatal examination                                                                           |  |  |  |
|                                                                                                     | Individual manual handling risk assessment and tissue viability issues – advice and action plan |  |  |  |
|                                                                                                     | Discuss weight management and exercise in pregnancy                                             |  |  |  |
|                                                                                                     | Follow up investigation results                                                                 |  |  |  |
| <b>36-38 wks</b>                                                                                    | Review all pathways                                                                             |  |  |  |
|                                                                                                     | USS for growth and fetal wellbeing                                                              |  |  |  |
|                                                                                                     | Weigh and calculate weight gain                                                                 |  |  |  |
|                                                                                                     | Antenatal examination                                                                           |  |  |  |
|                                                                                                     | Discuss weight management and exercise in pregnancy                                             |  |  |  |
|                                                                                                     | Follow up investigation results                                                                 |  |  |  |
|                                                                                                     | Review all pathways                                                                             |  |  |  |
|                                                                                                     | Review and discuss Anaesthetic labour/delivery management plan                                  |  |  |  |
|                                                                                                     | Discuss possible intrapartum complications                                                      |  |  |  |
|                                                                                                     | Ensure infant feeding check list has been fully completed                                       |  |  |  |
|                                                                                                     | Positions in labour discussed to support normal birth/ birth plan                               |  |  |  |
|                                                                                                     | Advise to withhold enoxaparin at onset of labour or day of LSCS                                 |  |  |  |
| Liaise with labour/theatre unit if booked for IOL or LSCS to ensure appropriate equipment available |                                                                                                 |  |  |  |

| Action Labour                                                                                                     | √ Tick or add when complete or N/A |             |         |
|-------------------------------------------------------------------------------------------------------------------|------------------------------------|-------------|---------|
|                                                                                                                   | BMI 30 -34.9                       | BMI 35-39.9 | BMI ≥40 |
| Place of delivery –Low dependency- follow low dependency protocols                                                |                                    |             |         |
| Place of delivery – High dependency                                                                               |                                    |             |         |
| If high dependency with no other risk factors can follow low dependency protocols on delivery suite               |                                    |             |         |
| Insert IV cannulae if Antenatal Thromboprophylaxis administered, H/O APH or previous PPH obtain FBC, group & save |                                    |             |         |
| BMI> 40 insert IV cannulae FBC, group & save                                                                      |                                    |             |         |
| IV cannulae commence VIP chart                                                                                    |                                    |             |         |
| Continuous CTG monitoring, may need FSE                                                                           |                                    |             |         |
| Inform duty anaesthetist need for anaesthetic review                                                              |                                    |             |         |
| Inform consultant obstetrician of admission                                                                       |                                    |             |         |
| Ranitidine as per protocol                                                                                        |                                    |             |         |
| Pressure care guidelines                                                                                          |                                    |             |         |
| TED stocking to be worn throughout labour                                                                         |                                    |             |         |
| Active management of 3rd stage of labour recommended and documented in notes                                      |                                    |             |         |
| If LSCS delivery -commence LSCS pathway                                                                           |                                    |             |         |

| Action Postnatal                                 | √ Tick or add when complete or N/A |             |         |
|--------------------------------------------------|------------------------------------|-------------|---------|
|                                                  | BMI 30-34.9                        | BMI 35-39.9 | BMI ≥40 |
| Individualised postnatal plan of care documented |                                    |             |         |
| Record observations as per guidelines            |                                    |             |         |

Additional file 1: Maternal obesity care pathways according to BMI (2012)

|                                                                                                                                     |  |  |  |
|-------------------------------------------------------------------------------------------------------------------------------------|--|--|--|
| Discuss analgesia requirements                                                                                                      |  |  |  |
| Postpartum thromboprophylaxis assessment, encourage early and regular ambulation                                                    |  |  |  |
| If LSCS delivery -complete caesarean section checklist for inspection of wounds proforma- to support strict attention to wound care |  |  |  |
| Provide bladder care as per guideline                                                                                               |  |  |  |
| Continue Vitamin D 10µg (Healthy Start Women's Vitamins) if Breastfeeding                                                           |  |  |  |
| Contraceptive advice offered                                                                                                        |  |  |  |
| Provide pre conceptual information on commencing folic acid 5 mgs 1 month before stopping conception                                |  |  |  |
| Healthy life style advice given<br>Sign post to community weight management services                                                |  |  |  |
| Opportunity to talk about birth offered                                                                                             |  |  |  |
| Discharge check list completed                                                                                                      |  |  |  |
